# Supplementary material for: Enhanced IL-17 Producing and Maintained Cytolytic Effector Functions of Gut Mucosal CD161+CD8+ T Cells in SIV-Infected Rhesus Macaques
Source: MDPI journal article supplement (doi:10.3390/v15091944), 2023-09-18
Supplement: s1 [file s1]

**Supplementary Material**

# **Enhanced IL-17 producing and maintained cytolytic effector functions of gut mucosal CD161<sup>+</sup>CD8<sup>+</sup> T cells in SIV-infected rhesus macaques**

**Siva Thirugnanam<sup>1</sup>, Edith M. Walker<sup>1</sup>, Faith Schiro<sup>1</sup>, Pyone P. Aye<sup>1</sup>, Jay Rappaport<sup>1</sup>, and Namita Rout<sup>1, 2, 3\*</sup>**

<sup>1</sup> Tulane National Primate Research Center, Covington, LA 70433, USA;  
tsivasakthivel@tulane.edu (S.T.); ewalker5@tulane.edu (E.M.W.); fcaillo@tulane.edu (F.S.);  
paye@tulane.edu (P.P.A.)

<sup>2</sup> Department of Microbiology and Immunology, Tulane University School of Medicine, New Orleans, LA 70112, USA

<sup>3</sup> Tulane Center for Aging, Tulane University School of Medicine, New Orleans, LA 70112, USA

\* Correspondence: nrout@tulane.edu

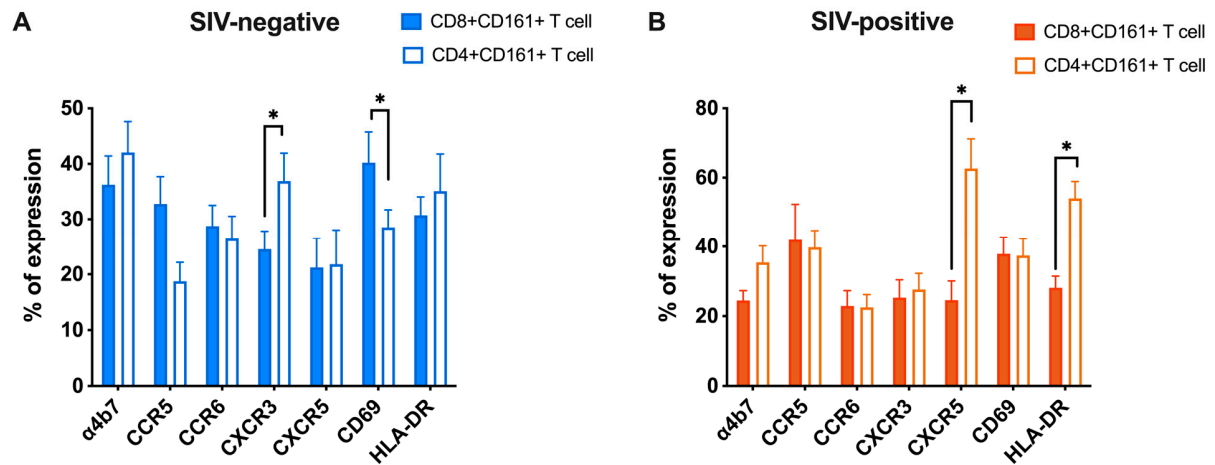

**Figure S1. Difference between CD161<sup>+</sup>CD8<sup>+</sup> T and CD161<sup>+</sup>CD4<sup>+</sup> T cell expression of trafficking and activation markers within SIV-negative and SIV-positive groups.** Comparison of frequencies of trafficking markers ( $\alpha 4\beta 7$ , CCR5, CCR6, CXCR3, and CXCR5) and activation markers (CD69 and HLA-DR) between CD161<sup>+</sup>CD4<sup>+</sup> T cells and CD161<sup>+</sup>CD8<sup>+</sup> T cells within (A) SIV-negative group and (B) SIV-infected group of macaques are shown for PBMC isolated from 13 SIV-negative macaques and 11 chronic SIV-infected macaques. Error bars show mean and SEM for each group. Groups were compared using Wilcoxon matched-pairs signed-rank test. Asterisks indicate significant differences between the groups (\* $p < 0.05$ ).

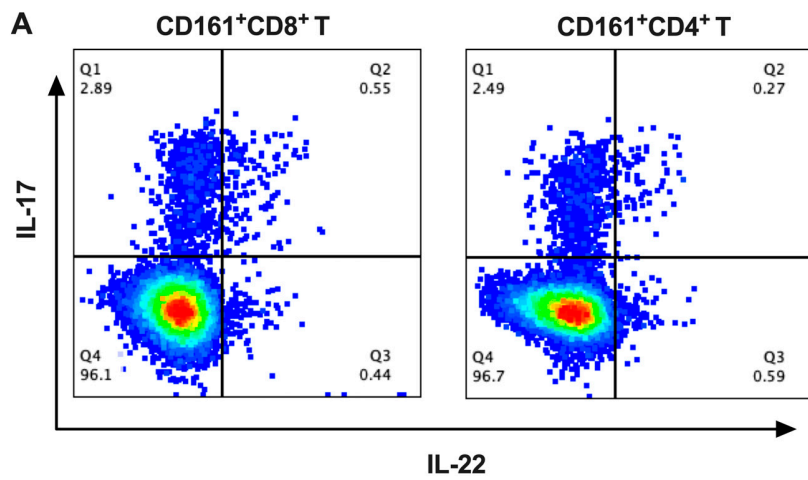

**Figure S2. Flow cytometry plots showing CD161<sup>+</sup> T cell subsets expressing IL-17 and/or IL-22 in a SIV-infected macaque.** Intracellular cytokine staining for IL-17 and IL-22 cytokines was carried out on CD161-expressing T cells and evaluated by gating on CD161<sup>+</sup> CD8<sup>+</sup> T cells and CD161<sup>+</sup>CD4<sup>+</sup> T cells.

Supplementary Table S1. Antibodies for Flow Cytometric Analysis.

| Antibody          | Flouochrome | Vendor                      | Clone       | Catalog #  |
|-------------------|-------------|-----------------------------|-------------|------------|
| FVS700            | AF700       | BD                          |             | 564997     |
| CD45              | BV510       | BD                          | D058-1283   | 563530     |
| CD3               | APC-Cy7     | BD                          | SP34-2      | 557757     |
| CD4               | BV650       | BD                          | L200        | 563737     |
| CD8               | BV605       | BD                          | SK1         | 564116     |
| CD161             | PE-Cy7      | Biolegend                   | HP-3G10     | 339918     |
| TCR g/d           | PE-Cy7      | Biolegend                   | B1          | 331222     |
| TCR Va7.2         | BV421       | Biolegend                   | 3C10        | 351716     |
| CCR5/ CD195       | APC         | BD                          | 3A9         | 560748     |
| CCR6/ CD196       | PCP-Cy5.5   | BD                          | 11A9        | 560467     |
| CXCR3/<br>CD183   | BV510       | Biolegend                   | G025H7      | 353726     |
| CXCR5             | AL488       | BD                          | RF8B2       | 558112     |
| IL-18R $\alpha$   | PE          | R&D                         | 70625       | FAB840P    |
| CD69              | PE-CF594    | BD                          | FN50        | 562617     |
| Granzyme B        | PE          | BD                          | GB11        | 561142     |
| IFN- $\gamma$     | BV510       | Biolegend                   | 4S.B3       | 502544     |
| IL-17             | PCP-Cy5.5   | eBioscience                 | eBio64DEC17 | 12-7179-42 |
| IL-22             | APC         | Invitrogen                  | IL22JOP     | 17-7222-82 |
| TNF- $\alpha$     | AF700       | BD                          | MAb11       | 557996     |
| CD1dTM            | APC         | <i>NIH Tetramer core</i>    |             |            |
| $\alpha_4\beta_7$ | APC         | <i>NHP Reagent resource</i> | A4B7R1      | AB_2819257 |
